# Supplementary material for: Primary-school-aged children inspire their peers and families to eat more vegetables in the KiiDSAY project: a qualitative descriptive study
Source: Springer Nature journal article supplement (doi:10.1186/s12887-024-04643-z), 2024-03-09
Supplement: MOESM1 [file 26846890]

**Additional file 1:** Focus Group Interview Questions, Key Constructs and Theoretical Frameworks for KiiDSAY Project

|                                   | Focus group interview questions                                                                                | Theoretical Frameworks and Key Constructs     | Definitions of key constructs                                                                                                                                                                                                 |
|-----------------------------------|----------------------------------------------------------------------------------------------------------------|-----------------------------------------------|-------------------------------------------------------------------------------------------------------------------------------------------------------------------------------------------------------------------------------|
| <b>A.</b>                         | Q1. What did you like the most about FEAST?                                                                    | Experience – Phenomenology                    | Reciprocal Determinism - behaviour is influenced bidirectionally, between the individual and their environment; children are influenced by and can influence their environment (microsystem i.e. peers, family, home, school) |
| <b>FEAST Feedback Questions</b>   | (Prompt: what did you think of the cooking classes?)<br>Q2. If you could, how would you make FEAST better?     | SCT [1] and EMHB [2] - Reciprocal Determinism |                                                                                                                                                                                                                               |
| <b>B.</b>                         | Q3. Do you think that FEAST helped you to eat more vegetables?                                                 | SCT - Behaviour change                        | Behavioural capacity – to be capable of change, which depends on knowledge and skills.                                                                                                                                        |
| <b>Vegetable Intake Questions</b> | Q3a. If ‘yes’, how? Or... If ‘no’, why not?<br>Prompt: What do you think will help you to eat more vegetables? | SCT - Facilitators                            | Facilitator- perceived facilitators to behavior change.                                                                                                                                                                       |
|                                   | Q4. What do you think prevents you from eating vegetables?                                                     | SCT - Barriers                                | Barriers- perceived Barriers to behavior change                                                                                                                                                                               |
|                                   | Q5. What do you think would make it easier for children to eat more vegetables?                                | SCT - Facilitators                            | Facilitator- perceived facilitators to behavior change                                                                                                                                                                        |
| <b>C.</b>                         | Q6. Do you think you could help your friends to eat more vegetables?                                           | SCT - Reciprocal Determinism and Role Models  | Reciprocal Determinism- behaviour is influenced bidirectionally, between the individual and their environment.                                                                                                                |
| <b>Influencer Questions</b>       | (Prompt: inspire, influence, motivate, encourage)<br>Q6a. If ‘yes’, how? Or... If ‘no’, why not?               | EMHB - Reciprocal Determinism                 | Role models- the behaviors of people that individuals copy.                                                                                                                                                                   |

---

|                   |                                                                                                                                                                         |                                                                                   |                                                                                                                                                                          |
|-------------------|-------------------------------------------------------------------------------------------------------------------------------------------------------------------------|-----------------------------------------------------------------------------------|--------------------------------------------------------------------------------------------------------------------------------------------------------------------------|
|                   | Q7. Do you think you could help your family to eat more vegetables?<br>(Prompt: inspire, influence, motivate, encourage)<br>Q7a. If 'yes', how? Or... If 'no', why not? | SCT - Reciprocal Determinism and Role Models<br>EMHB - Reciprocal Determinism     | AA                                                                                                                                                                       |
| <b>D. Actions</b> | Q8a. What actions would you take to share <i>your</i> ideas with your class/school?<br>Q8b. What actions would you take to share <i>your</i> ideas with your family?    | SCT - Reciprocal Determinism<br>EMHB - Reciprocal Determinism<br>SCT – Strategies | Reciprocal Determinism - Create and change their environments; be the change makers among their peers/family/school<br>Strategies - or plans to realize goals or actions |

---

**Legend:** *FEAST* Food Education and Sustainability Training; *SCT* Social Cognitive Theory [1]; *EMHB* The Ecological Model of Health Behaviour [2]

**References:**

1. Bandura A: Health Promotion by Social Cognitive Means. *Health Educ Behav* 2004, 31(2):143-164.
2. Bronfenbrenner U: Ecological models of human development. In: *International Encyclopedia of Education. Volume Vol. 3*, 2nd edn. Edited by Husen T, Postlethwaite TN. Oxford, England: Pergamon Press/Elsevier Science; 1994: 1643-1647.
